# Supplementary material for: Exposure to Streptococcus anginosus facilitates lipid metabolism disorder in obese mouse model
Source: Research Square preprint supplement (doi:10.21203/rs.3.rs-7055704/v1), 2025-07-18
Supplement: Supplementary file 1 [file 1923c28b265a91865fd0ea6f.docx]

**Table 2: Results of MR Analysis of Gut Microbiota Associated with Causal Links to Hyperlipidemia GWAS in Korean National Biobank.**

| **Outcome** | **Exposure** | **Method** | **nSNPs** | **β** | **Se** | ***P* val** |
| --- | --- | --- | --- | --- | --- | --- |
| Hyperlipidemia | *Streptococcus* | MR Egger | 12 | 0.043 | 0.050 | 0.382 |
| Hyperlipidemia | *Streptococcus* | Weighted median | 12 | -0.042 | 0.013 | 0.001** |
| Hyperlipidemia | *Streptococcus* | Inverse variance weighted | 12 | -0.040 | 0.010 | 0.004** |
| Hyperlipidemia | *Streptococcus* | Simple mode | 12 | -0.120 | 0.038 | 0.002** |
| Hyperlipidemia | *Streptococcaceae* | MR Egger | 12 | 0.029 | 0.043 | 0.511 |
| Hyperlipidemia | *Streptococcaceae* | Weighted median | 10 | -0.037 | 0.014 | 0.008** |
| Hyperlipidemia | *Streptococcaceae* | Inverse variance weighted | 10 | -0.044 | 0.009 | 0.043* |
| Hyperlipidemia | *Streptococcaceae* | Simple mode | 10 | -0.117 | 0.041 | 0.005** |
| Hyperlipidemia | *Streptococcaceae* | Weighted mode | 10 | -0.024 | 0.032 | 0.454 |
| Hyperlipidemia | *Streptococcaceae* | MR Egger | 10 | -0.089 | 0.031 | 0.005** |
