# Supplementary material for: Exposure to Streptococcus anginosus facilitates lipid metabolism disorder in obese mouse model
Source: Research Square preprint supplement (doi:10.21203/rs.3.rs-7055704/v1), 2025-07-18
Supplement: Supplementary file 2 [file 646d47534910d279e25c7e35.docx]

**Supplementary Material 1: Primer sequences used in this study.**

| **Gene** | **Primer** | **Sequence（5’ to 3’）** |
| --- | --- | --- |
| *β-actin* | Forward | TATGCTCTCCCTCACGCCATCC |
| *β-actin* | Reverse | GTCACGCACGATTTCCCTCTCAG |
| *Lpl* | Forward | TCTGTGTCTAACTGCCACTTCAACC |
| *Lpl* | Reverse | CATACATTCCTGTCACCGTCCATCC |
| *Gapdh* | Forward | CGTGCCGCCTGGAGAAACC |
| *Gapdh* | Reverse | TGGAAGAGTGGGAGTTGCTGTTG |
| *Fasn* | Forward | GCTGCTCGGATCACTAGTGAA |
| *Fasn* | Reverse | TGTAGCCCACGAGTGTCTCG |
| *Acc* | Forward | AGCTGATCCTGCGAACCT |
| *Acc* | Reverse | GCCAAGCGGATGTAAACT |
| *Srebp-1c* | Forward | CCAGAGGGTGAGCCTGACAA |
| *Srebp-1c* | Reverse | AGCCTCTGCAATTTCCAGATCT |
| *Ppar γ* | Forward | TCGCTGATGCACTGCCTATG |
| *Ppargγ* | Reverse | GAGAGGTCCACAGAGCTGATT |
| *Dgat2* | Forward | AGTGGCAATGCTATCATCATCGT |
| *Dgat2* | Reverse | TCTTCTGGACCCATCGGCCCCAGGA |
| *Apob100* | Forward | TTGGCAAACTGCATAGCATCC |
| *Apob100* | Reverse | TCAAATTGGGACTCTCCTTTAGC |
| *Cebpα* | Forward | CAAGAACAGCAACGAGTACCG |
| *Cebpα* | Reverse | GTCACTGGTCAACTCCAGCAC |
| *Hsl* | Forward | CGCCATAGACCCAGAGTT |
| *Hsl* | Reverse | TCCCGTAGGTCATAGGAGAT |
