# Supplementary material for: Exposure to Streptococcus anginosus facilitates lipid metabolism disorder in obese mouse model
Source: Research Square preprint supplement (doi:10.21203/rs.3.rs-7055704/v1), 2025-07-18
Supplement: Supplementary file 3 [file 6576d9634c1739342433497c.docx]

**Table 3: Pleiotropy test of instrumental variables in the MR analysis of lipoprotein metabolism disorders and gut microbiota.** The Egger Intercept represents the intercept term in the MR Egger algorithm, Se indicates the standard error of the effect size, which is used to calculate the confidence interval and P value of the intercept. A value of the intercept close to 0 and *P* > 0.05 indicates that there is no significant level pleiotropy in the MR analysis between gut microbiota and lipoprotein metabolism disorders.

| **Exposure** | **Egger_intercept** | **Se** | ***P* val** |
| --- | --- | --- | --- |
| *Bilophila unclassified* | -0.00106 | 0.022537 | 0.96443 |
| *Bilophila* | -0.01645 | 0.026582 | 0.599049 |
| *Escherichia coli* | -0.01517 | 0.010819 | 0.19447 |
| *Streptococcaceae* | 0.003128 | 0.013146 | 0.816297 |
| *Parabacteroides goldsteinii* | 0.02856 | 0.035103 | 0.461526 |
| *Bacteroides cellulosilyticus* | 0.010758 | 0.015941 | 0.518783 |
| *Ruminococcus* | -0.01887 | 0.019027 | 0.359566 |
| *Bacilli* | -0.01645 | 0.026582 | 0.599049 |
| *Bacteroides finegoldii* | -0.00011 | 0.011916 | 0.992583 |
