# Supplementary material for: Exposure to Streptococcus anginosus facilitates lipid metabolism disorder in obese mouse model
Source: Research Square preprint supplement (doi:10.21203/rs.3.rs-7055704/v1), 2025-07-18
Supplement: Supplementary file 4 [file 6dc88d2ebd847350905824a9.docx]

**Table 4: Heterogeneity Test of Instrumental Variables for MR Analysis of Lipoprotein Metabolism Disorders and Gut Microbiota.** Q represents the statistic of the residual sum of squares, Qdf represents the degrees of freedom of the residual sum of squares, and Q *P*val represents the p-value of the test statistic. A Q *P*val > 0.05 indicates that there is no significant heterogeneity in the MR analysis between gut microbiota and lipoprotein metabolism disorders.

| **Exposure** | **Method** | **Q** | **Qdf** | **Q *P*val** |
| --- | --- | --- | --- | --- |
| *Escherichia* | MR Egger | 9.428772 | 6 | 0.150861 |
| Inverse variance weighted | 10.9113 | 7 | 0.142535 |
| *Bilophila unclassified* | MR Egger | 4.160643 | 5 | 0.526527 |
| Inverse variance weighted | 4.16284 | 6 | 0.65465 |
| *Bilophila* | MR Egger | 0.233505 | 2 | 0.889805 |
| Inverse variance weighted | 0.61662 | 3 | 0.892617 |
| *Escherichia coli* | MR Egger | 5.312722 | 9 | 0.80624 |
| Inverse variance weighted | 7.278129 | 10 | 0.698953 |
| *Streptococcaceae* | MR Egger | 5.481484 | 11 | 0.90563 |
| Inverse variance weighted | 5.538102 | 12 | 0.937556 |
| *Parabacteroides goldsteinii* | MR Egger | 8.483128 | 4 | 0.0754 |
| Inverse variance weighted | 9.886999 | 5 | 0.078501 |
| *Bacteroides cellulosilyticus* | MR Egger | 14.23659 | 8 | 0.075803 |
| Inverse variance weighted | 15.0471 | 9 | 0.08965 |
| *Ruminococcus* | MR Egger | 5.127008 | 6 | 0.52763 |
| Inverse variance weighted | 6.110791 | 7 | 0.526874 |
| *Bacilli* | MR Egger | 11.3363 | 10 | 0.331924 |
| Inverse variance weighted | 11.35391 | 11 | 0.414107 |
| *Bacteroides finegoldii* | MR Egger | 14.63459 | 10 | 0.145963 |
| Inverse variance weighted | 14.63473 | 11 | 0.199837 |
