# Supplementary material for: Exposure to Streptococcus anginosus facilitates lipid metabolism disorder in obese mouse model
Source: Research Square preprint supplement (doi:10.21203/rs.3.rs-7055704/v1), 2025-07-18
Supplement: Supplementary file 5 [file 8614ef948f803e9db495429e.docx]

**Table 1: Results of MR Analysis of Gut Microbiota Associated with Causal Links to Disorders of Lipoprotein Metabolism GWAS in Finngen.**

| **Outcome** | **Exposure** | **Method** | **nSNPs** | **β** | **Se** | ***P* val** |
| --- | --- | --- | --- | --- | --- | --- |
| Disorders of lipoprotein metabolism | *Escherichia* | MR Egger | 8 | 0.229 | 0.306 | 0.482 |
| Weighted median | 8 | 0.254 | 0.123 | 0.040* |
| Inverse variance weighted | 8 | 0.223 | 0.091 | 0.014* |
| Simple mode | 8 | 0.233 | 0.197 | 0.274 |
| Weighted mode | 8 | 0.282 | 0.207 | 0.215 |
| Disorders of lipoprotein metabolism | *Bilophila unclassified* | MR Egger | 7 | -0.289 | 0.725 | 0.707 |
| Weighted median | 7 | -0.213 | 0.138 | 0.123 |
| Inverse variance weighted | 7 | -0.236 | 0.102 | 0.020* |
| Simple mode | 7 | -0.033 | 0.212 | 0.880 |
| Weighted mode | 7 | -0.045 | 0.221 | 0.847 |
| Disorders of lipoprotein metabolism | *Streptococcaceae* | MR Egger | 13 | 0.117 | 0.248 | 0.646 |
| Weighted median | 13 | 0.133 | 0.073 | 0.067 |
| Inverse variance weighted | 13 | 0.119 | 0.054 | 0.026* |
| Simple mode | 13 | 0.139 | 0.116 | 0.256 |
| Weighted mode | 13 | 0.125 | 0.113 | 0.290 |

| **Outcome** | **Exposure** | **Method** | **nSNPs** | **β** | | **Se** | ***P* val** | |
| --- | --- | --- | --- | --- | --- | --- | --- | --- |
| Disorders of lipoprotein metabolism | *Parabacteroides goldsteinii* | MR Egger | 6 | -0.182 | 0.345 | | | 0.625 |
| Weighted median | 6 | -0.112 | 0.062 | | | 0.073 |
| Inverse variance weighted | 6 | -0.124 | 0.051 | | | 0.015* |
| Simple mode | 6 | -0.084 | 0.087 | | | 0.381 |
| Weighted mode | 6 | -0.075 | 0.098 | | | 0.479 |
| Disorders of lipoprotein metabolism | *Bilophila* | MR Egger | 4 | 0.591 | | 0.820 | 0.546 | |
| Weighted median | 4 | -0.280 | | 0.162 | 0.084 | |
| Inverse variance weighted | 4 | -0.271 | | 0.135 | 0.045* | |
| Simple mode | 4 | -0.377 | | 0.254 | 0.234 | |
| Weighted mode | 4 | -0.344 | | 0.221 | 0.218 | |
| Disorders of lipoprotein metabolism | *Bacteroides cellulosilyticus* | MR Egger | 10 | 0.067 | | 0.251 | 0.798 | |
| Weighted median | 10 | 0.121 | | 0.083 | 0.144 | |
| Inverse variance weighted | 10 | 0.149 | | 0.061 | 0.014* | |
| Simple mode | 10 | 0.028 | | 0.138 | 0.843 | |
| Weighted mode | 10 | 0.043 | | 0.117 | 0.721 | |
| Disorders of lipoprotein metabolism | *Ruminococcus* | MR Egger | 8 | -0.297 | | 0.523 | 0.591 | |
| Weighted median | 8 | -0.239 | | 0.125 | 0.055* | |
| Inverse variance weighted | 8 | -0.235 | | 0.094 | 0.013* | |
| Simple mode | 8 | -0.236 | | 0.198 | 0.271 | |
| Weighted mode | 8 | -0.231 | | 0.176 | 0.232 | |

| **Outcome** | **Exposure** | **Method** | **nSNPs** | **β** | **Se** | ***P* val** |
| --- | --- | --- | --- | --- | --- | --- |
| Disorders of lipoprotein metabolism | *Bacilli* | MR Egger | 12 | 0.320 | 0.280 | 0.279 |
| Weighted median | 12 | 0.115 | 0.080 | 0.154 |
| Inverse variance weighted | 12 | 0.119 | 0.060 | 0.049* |
| Simple mode | 12 | 0.044 | 0.140 | 0.757 |
| Weighted mode | 12 | 0.069 | 0.132 | 0.612 |
| Disorders of lipoprotein metabolism | *Bacteroides finegoldii* | MR Egger | 12 | -0.219 | 0.155 | 0.187 |
| Weighted median | 12 | -0.075 | 0.060 | 0.207 |
| Inverse variance weighted | 12 | -0.094 | 0.046 | 0.042* |
| Simple mode | 12 | -0.104 | 0.118 | 0.396 |
| Weighted mode | 12 | -0.093 | 0.114 | 0.432 |
| Disorders of lipoprotein metabolism | *Escherichia coli* | MR Egger | 11 | 0.059 | 0.242 | 0.812 |
| Weighted median | 11 | -0.159 | 0.081 | 0.052* |
| Inverse variance weighted | 11 | -0.144 | 0.062 | 0.021* |
| Simple mode | 11 | -0.235 | 0.123 | 0.085 |
| Weighted mode | 11 | -0.229 | 0.126 | 0.099 |
